# Supplementary material
Source: MDPI journal article supplement (https://www.mdpi.com/2079-6439/6/2/41)
Supplement: s1 [file s1]

Article

# Fluoropolymer-Wrapped Conductive Threads for Textile Touch Sensors Operating via the Triboelectric Effect

Morgan Baima and Trisha L. Andrew \*

Departments of Chemistry and Chemical Engineering, University of Massachusetts Amherst, Amherst, MA 01003, USA; morgan.baima@gmail.com

\* Correspondence: tandrew@umass.edu; Tel.: +1-413-545-1651

Video S1, WovenTextileTouchSensor\_LowRes.mp4

Video showing the textile sensor responding to various touch events in real time.

Figure S1, Voltage output of the woven textile touch sensor under different, dirty operating conditions.

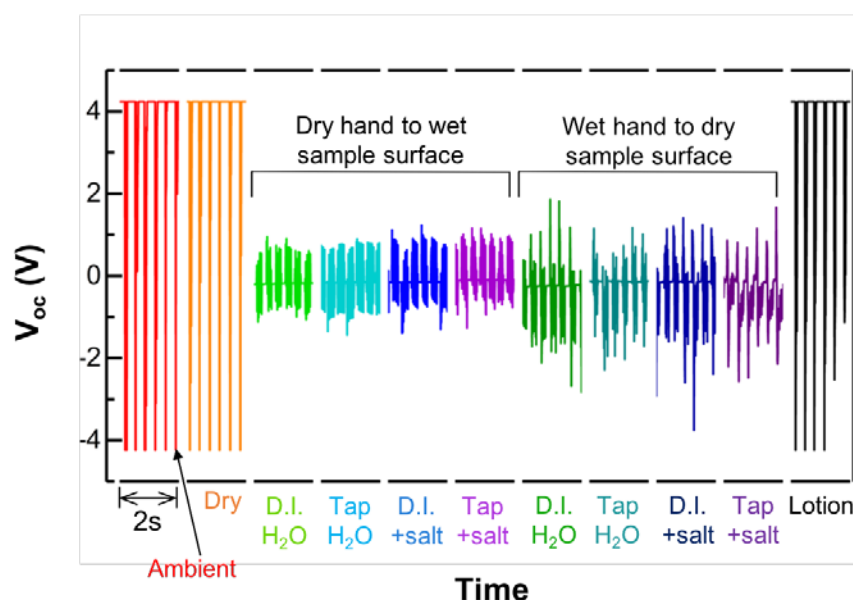

**Figure S1.** Voltage output of the woven textile touch sensor under different, dirty operating conditions.
