# Supplementary material
Source: MDPI journal article supplement (https://www.mdpi.com/2079-6439/6/2/41)
Supplement: s1 [file s1]

Archive with 2 entries (2 files):
- fibers-305728-suppl.pdf
- WovenTextileTouchSensor_LowRes.mp4
